# Supplementary material
Source: Springer Nature journal article supplement (https://www.springermedizin.de/resource/supplementary/12936_2014_3377_MOESM6_ESM.pdf/9545790)
Supplement: MOESM6 [file 9545790]

Table 2. LLIN durability: T<sub>0</sub> survivorship

| Characteristics    | Cell     | LLIN Thread  | households visited | households dropped* | LLINs households enrolled** | % LLIN survivorship***<br>T <sub>0</sub> |
|--------------------|----------|--------------|--------------------|---------------------|-----------------------------|------------------------------------------|
| peri-urban endemic | Cyimo    | polyester    | 500                | 93                  | 407                         | 100                                      |
|                    | Rusheshe | polyethylene | 500                | 32                  | 468                         |                                          |
| rural hypo-endemic | Bungwe   | polyester    | 500                | 24                  | 476                         |                                          |
|                    | Bushenya | polyethylene | 500                | 17                  | 483                         |                                          |
| rural endemic      | Rutabo   | polyester    | 500                | 63                  | 437                         |                                          |
|                    | Burima   | polyethylene | 500                | 26                  | 474                         |                                          |
| TOTAL              |          |              | 3000               | 255                 | 2745                        |                                          |

\* households were dropped because they were either (1) closed or (2) open, but had not received an LLIN

\*\* households re-visited during T<sub>6</sub> follow up visit

\*\*\* % of enrolled households with a coded LLIN at T<sub>0</sub> - by definition 100%
